# Supplementary material for: On the dual character of charged metal–molecule hybrids and the opposite behaviour of the forward and reverse CT processes
Source: Royal Society of Chemistry journal article supplement (doi:10.1039/c4cp03984j), 2014-01-01
Supplement: c4cp03984j1.pdf [file c4cp03984j1.pdf]

## ELECTRONIC SUPPLEMENTARY MATERIAL

### On the dual character of charged metal-molecule hybrids and the opposite behaviour of the forward and reverse CT processes

J. Roman-Perez, S. Centeno, M. R. López-Ramírez, J. F. Arenas, J. Soto, I. López-Tocón\* and J. C. Otero\*

Universidad de Málaga, Facultad de Ciencias, Dept. de Química Física, Unidad Asociada CSIC, 29071-Málaga, España. E-mail: tocon@uma.es, jc\_otero@uma.es; Fax and Tel: +34 952132019.

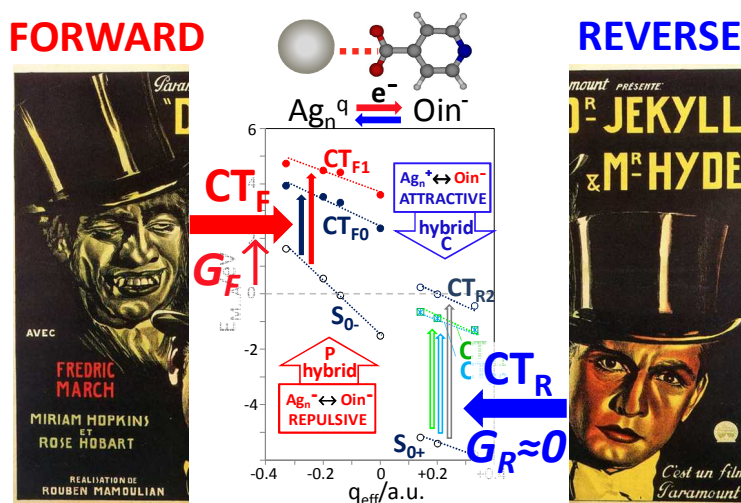

## **Computational details.**

All the density functional theory (DFT) calculations have been carried out by using the Gaussian 09 suite of programs.<sup>1</sup> The geometry of the ground state ( $S_0$ ) of each M-A system has been fully optimized with the only constrain of keeping the  $C_{2v}$  symmetry (see Fig. 1a) . Table S3 summarizes the corresponding Cartesian coordinates for the Ag-in<sup>-</sup> discussed complexes. Then, the singlet excited states have been obtained by means of time-dependent DFT (TDDFT) calculations.

Although in all the ground and excited states some amount of charge is donated from M to A or vice versa, the excited states with net transferred charges are easily recognized by comparing the Mulliken's charges of both moieties in the  $S_0$  and the excited  $S_i$  states ( $\Delta q_t = q_{A,S_i} - q_{A,S_0}$ ). Moreover, the corresponding single excitations of the CI expansion are checked in order to confirm the assignment. These CT states are characterized by significant  $\Delta q_t$  usually in the range 0.35-0.9 u.a., while the remaining non-CT excitations shows  $\Delta q_t < 0.1$  a.u.

Concerning the theoretical description of the CT excited states, it is well established that DFT requires full Hartree-Fock exchange, what means that, for instance, widespread used functionals like the hybrid B3LYP<sup>2</sup> are not adequate given that systematically underestimate the energies of the CT transitions. This is the reason why we have used the long-range corrected M06-HF<sup>3</sup> and wB97X-D<sup>4</sup> functionals which have been proposed to specifically solve this problem. Anyway, quantitative theoretical prediction of the energies of CT states remains a challenge. Finally, the LanL2DZ<sup>5</sup> basis set is an standard effective core pseudopotential very often used as basis set in organometallic calculations.

The discussion in the manuscript has been centered on the M06-HF in order to be compared with our previous results.<sup>6-8</sup> Tables S1 and S2 summarizes the TDDFT M06-HF and wB97X-D results for the CT states of the Ag-Nin<sup>-</sup> and Ag-Oin<sup>-</sup> complexes. This Table contains the corresponding root number, the respective vertical energies and symmetries,

the net donated charge in  $S_0$  when the complex is formed ( $\Delta q_{M \leftarrow A, S_0}$ ) and the net transferred charges ( $\Delta q_i$ ) in each CT state. Vertical excitation energies correspond to the difference between the respective energies of the ground  $S_0$  and the CT states calculated without any structural rearrangement, i.e., by keeping unaltered the nuclear positions of the optimized  $S_0$  geometry.

#### REFERENCES:

- 1.- M. J. Frisch et al, Gaussian 09, Revision A.02. Gaussian, Inc., Wallingford CT, 2009.
- 2.- C. Lee, W. Yang, R. G. Parr, *Phys. Rev. B*, 1988, **36**, 785.
- 3.- Y. Zhao and D. G. Truhlar, *J. Phys. Chem. A*, 2006, **110**, 13126.
- 4.- J.-D. Chai and M. Head-Gordon, *Phys. Chem. Chem. Phys.*, 2008, **10** 6615.
- 5.- P. J. Hay and W. R. Wadt, *J. Chem. Phys.*, 1985, **82**, 299 and references therein.
- 6.- J. Roman-Perez, C. Ruano, S. P. Centeno, I. López-Tocón, J. F. Arenas, J. Soto and J. C. Otero, *J. Phys. Chem. C*, 2014, **118**, 2718.
- 7.- F. Avila, D. J. Fernández, J. F. Arenas, J. C. Otero and J. Soto, *Chem. Commun.*, 2011, **47**, 4210 and references therein.
- 8.- F. Avila, C. Ruano, I. López-Tocón, J. F. Arenas, J. Soto and J. C. Otero, *Chem. Commun.*, 2011, **47**, 4213 and references therein.

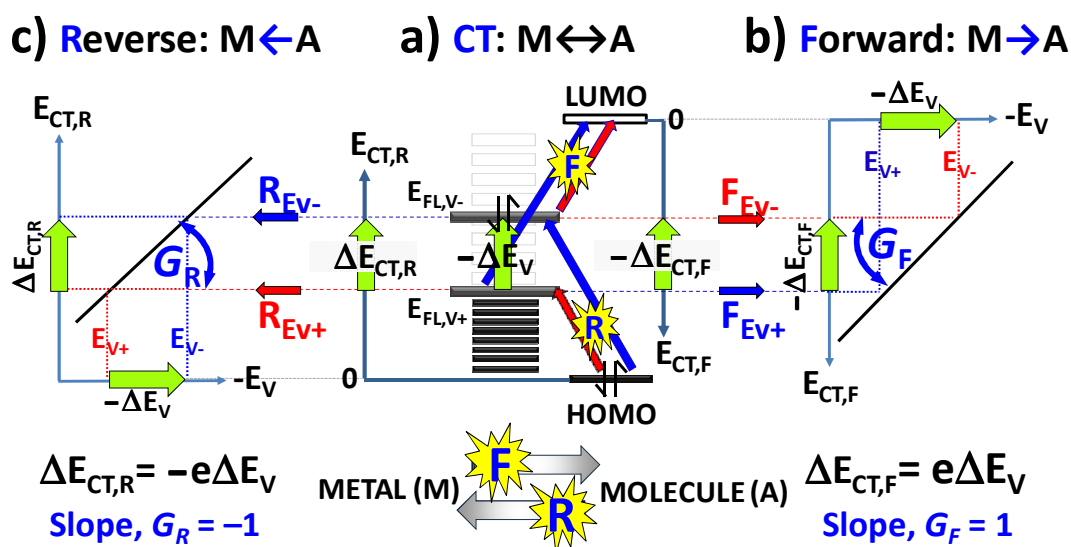

**Scheme S1.** Classical view of the effect of a negative shift of the electrode potential ( $-\Delta E_V = E_{V-} - E_{V+}$ ) on the energy of the Fermi level of the metal ( $\Delta E_{FL} = e\Delta E_V = E_{FL,V-} - E_{FL,V+}$ ) and on the CT energies, showing the equivalent red- and blue-shifts of the metal-to-molecule (M-A) CT transitions for the forward (F) and the reverse (R) processes,  $-\Delta E_{CT,F} = \Delta E_{CT,R}$ , respectively.

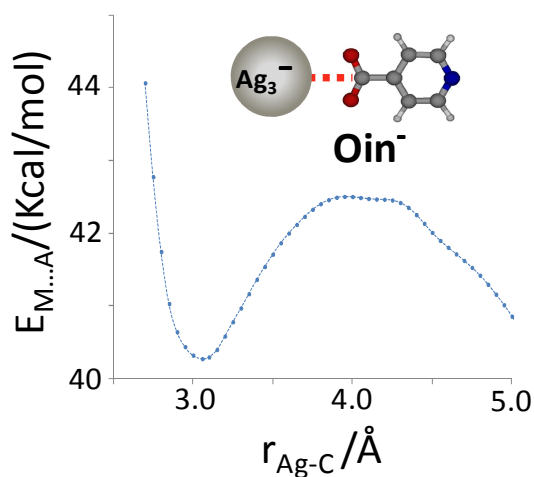

**Figure S1.** Dependence of the M06-HF/LanL2DZ bond energy ( $E_{M...A}/\text{Kcal/mol}$ ) between the  $\text{Ag}_3^{-1}$  metallic cluster and the isonicotinate anion bonded through the carboxylate ( $\text{Oin}^-$ ) on the Ag-C distance showing the metastable minimum at ca. 3 Å.

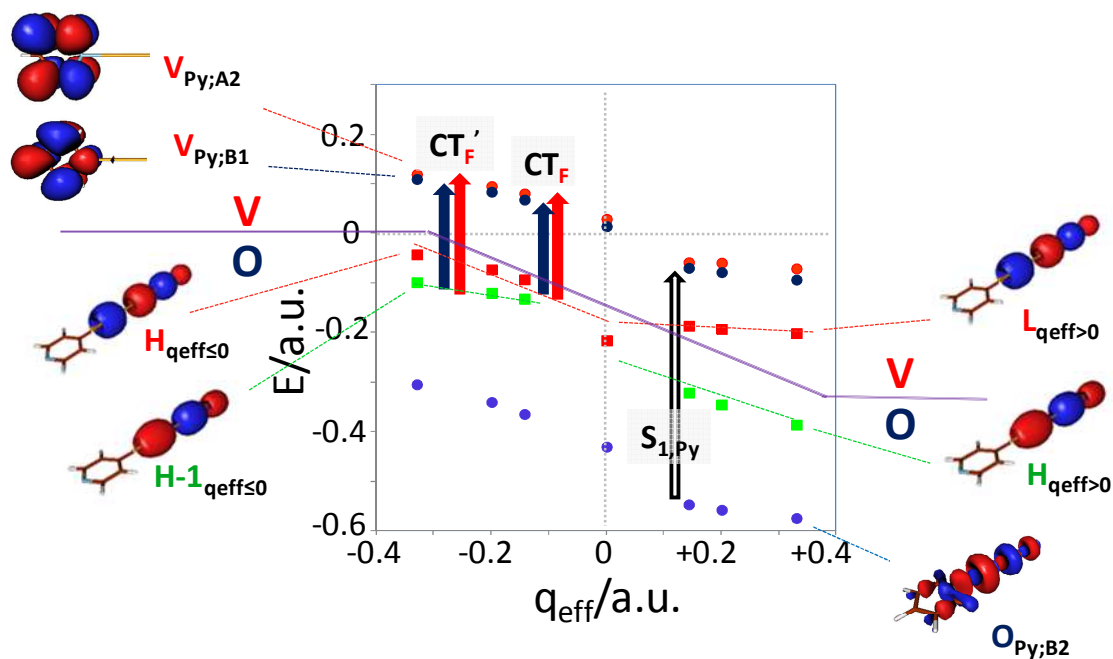

**Figure S2.** Dependence on  $q_{eff}$  of the M06-HF/LanL2DZ energies ( $E$ ) of the occupied (O) and virtual (V) molecular orbitals of the  $[Ag_n-Py]^q$  complex involved in the CT transitions. H, L and H-1 refers to the HOMO, LUMO and HOMO-1 orbitals of silver clusters at  $q_{eff} \leq 0$  or  $q_{eff} > 0$ , respectively (only orbitals of the  $Ag_7$  cluster are drawn).  $V_{Py}$  and  $O_{Py;B2}$  are the corresponding virtual and occupied orbitals of pyridine involved in the forward CT transition and in the  $S_0-S_{1,Py}$  excitation of pyridine, respectively. It can be seen that the orbitals related to the secondary  $CT'_F$  series ( $H-1 \rightarrow V_{Py}$ ) shows lesser dependence on  $q_{eff}$  than the main  $CT_F$  ( $H \rightarrow V_{Py}$ ) one, so explaining its very small slope  $S$  (eq. 1). Moreover, only a  $CT_F$  series survives at  $q_{eff} > 0$  given that the HOMO orbital at  $q_{eff} \leq 0$  is empty at positive charges and cannot be the origin of any forward CT transition.

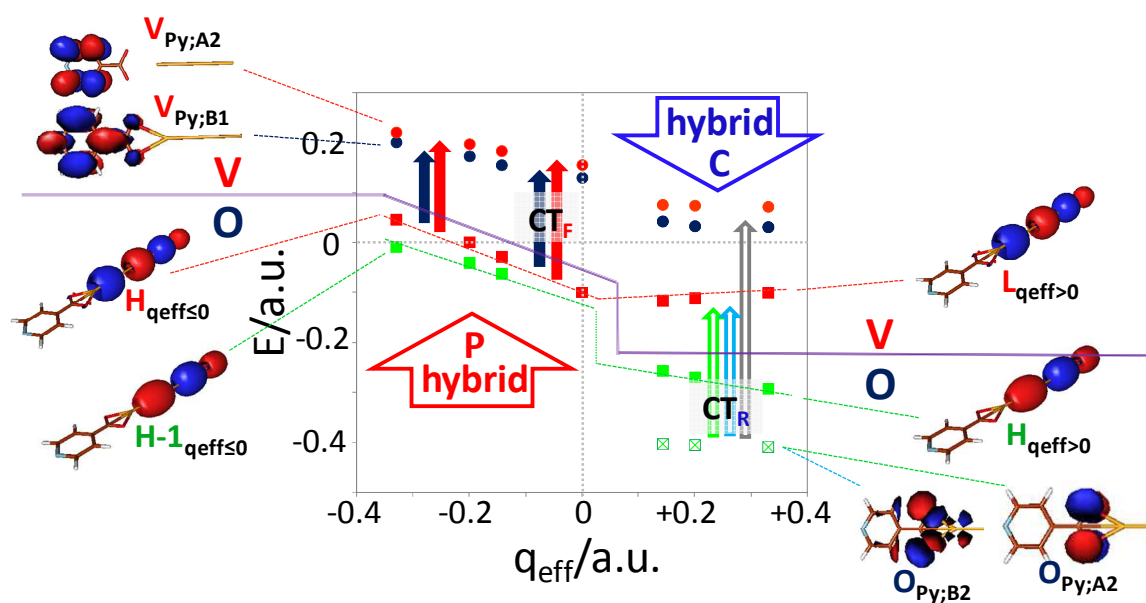

**Figure S3.** Dependence on  $q_{eff}$  of the M06-HF/LanL2DZ energies ( $E$ ) of the occupied (O) and virtual (V) molecular orbitals of the  $[(Ag_n)^q-Oin]^{q-1}$  complex involved in the CT transitions. H, L and H-1 refers to the HOMO, LUMO and HOMO-1 orbitals of silver clusters at  $q_{eff} \leq 0$  or  $q_{eff} > 0$ , respectively (only orbitals of the  $Ag_7$  cluster are drawn).  $V_{Py}$  and  $O_{Py}$  are the corresponding virtual and occupied orbitals of isonicotinate involved in the forward and reverse CT excitations, respectively. The dual character of the electronic structure of this hybrid is related to the significant gap of the HOMO when  $q_{eff}$  changes from negative to positive values. This gap can be also appreciated in the case of the  $Ag$ -Py complex (Fig. S1) but the transition is much smoother.

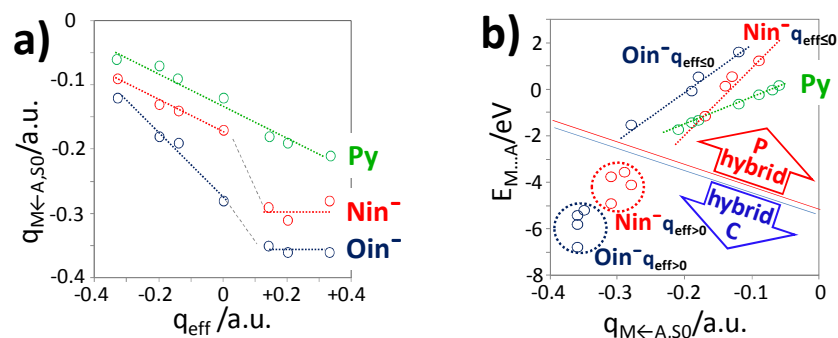

**Figure S4.** a) M06-HF/LanL2DZ Mulliken charges donated from the molecule (A) to the metal cluster (M) ( $q_{M\leftarrow A,S_0} = -q_{Py,S_0}$ ) in the corresponding  $S_0$  ground state of the complexes formed by pyridine (Py) or isonicotinate anion bonded to silver clusters through the nitrogen (Py and  $Nin^-$ ) or the carboxylate ( $Oin^-$ ) versus  $q_{eff}$ . b) Correlation between the strength of the M-A bond ( $E_{M...A}$ ) in  $S_0$  and the donated charge in the respective ground states  $q_{M\leftarrow A,S_0}$  of the three kind of complexes showing the differentiated dependence of P- and C-hybrids.

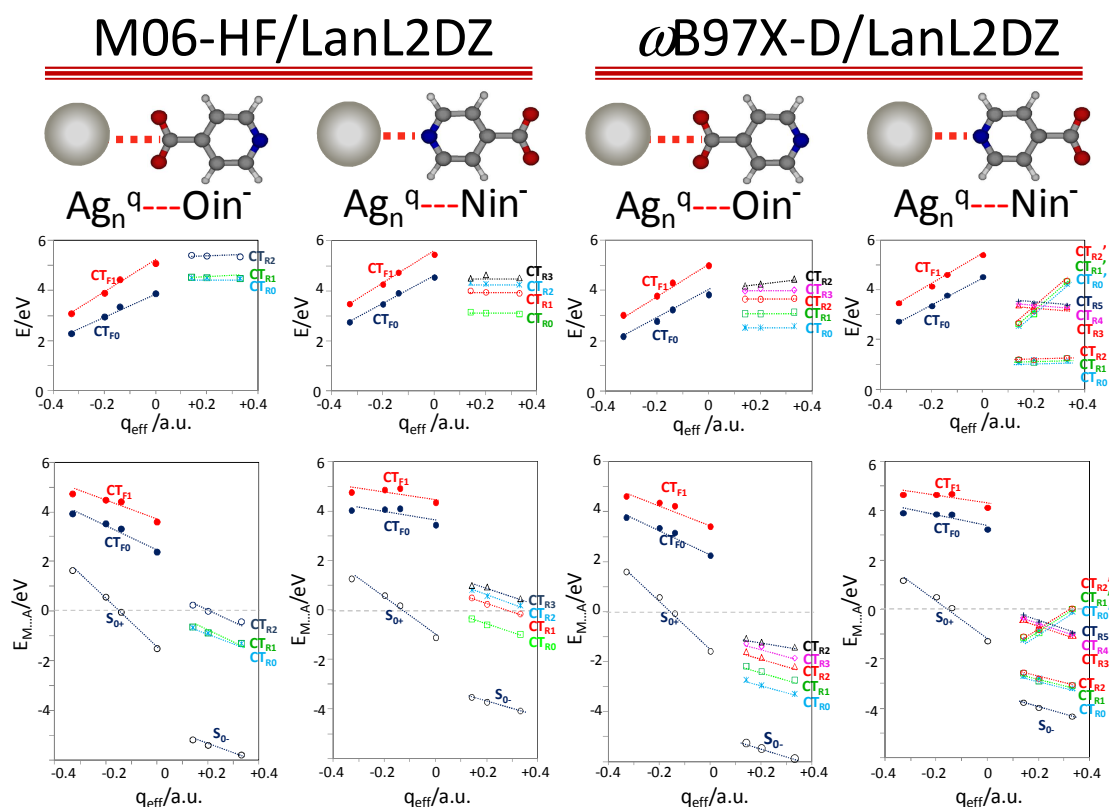

**Figure S5.** Dependence on  $q_{eff}$  of the M06-HF and wB97X-D/LanL2DZ energies ( $E$ , upper) of the ground ( $S_0$ ) and the forward ( $CT_{F1}$ ) and reverse ( $CT_{R1}$ ) charge transfer states of isonicotinate ( $in^-$ ) bonded to silver clusters ( $Ag_n^q$ ) through the aromatic nitrogen ( $Ag-Nin^-$ ) or the carboxylate ( $Ag-Oin^-$ ). Energies of the same states but referred to the energy of the respective metallic clusters and the adsorbate at infinite separation ( $E_{M...A}$ , bottom).

**Table S1.-** Time dependent M06-HF/LanL2DZ results for  $[(Ag_n)^q-Oin^{-}]^{q-1}$  and  $[(Ag_n)^q-Nin^{-}]^{q-1}$  complexes: donated charge in the ground  $S_0$  state ( $q_{M \leftarrow A, S_0}$ ) and transferred charge  $\Delta q_t$ , energies and symmetries of the roots ( $S_i$ ) corresponding to the forward ( $Ag \rightarrow in$ ) and reverse ( $in \rightarrow Ag$ )  $CT_{Fi}$  and  $CT_{Ri}$  excited states.

| Complex           | $q_{eff}$ | $[(Ag_n)^q-Oin^{-}]^{q-1}$ |              |                                | $[(Ag_n)^q-Nin^{-}]^{q-1}$ |                                |                           | CT direction        |
|-------------------|-----------|----------------------------|--------------|--------------------------------|----------------------------|--------------------------------|---------------------------|---------------------|
|                   |           | $q_{M \leftarrow A, S_0}$  | $\Delta q_t$ | CT states                      | $\Delta q_t$               | CT states                      | $q_{M \leftarrow A, S_0}$ |                     |
| $Ag_3^{-}-in^{-}$ | -0.33     | -0.12                      | -0.76        | $S_4=2.28eV (CT_{F0}), B_1$    | -0.74                      | $S_4=2.76eV (CT_{F0}), B_1$    | -0.09                     | Ag $\rightarrow$ in |
|                   |           |                            | -0.89        | $S_8=3.08eV (CT_{F1}), A_2$    | -0.85                      | $S_{12}=3.49eV (CT_{F1}), A_2$ |                           |                     |
| $Ag_5^{-}-in^{-}$ | -0.20     | -0.18                      | -0.58        | $S_7=2.95eV (CT_{F0}), B_1$    | -0.73                      | $S_{11}=3.48eV (CT_{F0}), B_1$ | -0.13                     | Ag $\rightarrow$ in |
|                   |           |                            | -0.87        | $S_{20}=3.90eV (CT_{F1}), A_2$ | -0.83                      | $S_{20}=4.27eV (CT_{F1}), A_2$ |                           |                     |
| $Ag_7^{-}-in^{-}$ | -0.14     | -0.19                      | -0.35        | $S_{11}=3.35eV (CT_{F0}), B_1$ | -0.52                      | $S_{20}=3.92eV (CT_{F0}), B_1$ | -0.14                     | Ag $\rightarrow$ in |
|                   |           |                            | -0.84        | $S_{32}=4.44eV (CT_{F1}), A_2$ | -0.84                      | $S_{38}=4.74eV (CT_{F1}), A_2$ |                           |                     |
| $Ag_2^{-}-in^{-}$ | 0.00      | -0.28                      | -0.43        | $S_4=3.88eV (CT_{F0}), B_1$    | -0.60                      | $S_8=4.55eV (CT_{F0}), B_1$    | -0.17                     | Ag $\rightarrow$ in |
|                   |           |                            | -0.90        | $S_{11}=5.09eV (CT_{F1}), A_2$ | -0.77                      | $S_{12}=5.46eV (CT_{F1}), A_2$ |                           |                     |
| $Ag_7^{+}-in^{-}$ | +0.14     | -0.35                      | +0.34        | $S_{16}=4.52eV (CT_{R0}), B_2$ | +0.83                      | $S_5=3.17eV (CT_{R0}), A_2$    | -0.29                     | in $\rightarrow$ Ag |
|                   |           |                            | +0.45        | $S_{17}=4.54eV (CT_{R1}), A_2$ | +0.79                      | $S_{14}=4.02eV (CT_{R1}), A_1$ |                           |                     |
|                   |           |                            | +0.25        | $S_{30}=5.42eV (CT_{R2}), A_1$ | +0.79                      | $S_{16}=4.34eV (CT_{R2}), B_2$ |                           |                     |
|                   |           |                            |              |                                | +0.83                      | $S_{20}=4.52eV (CT_{R3}), A_2$ |                           |                     |
| $Ag_5^{+}-in^{-}$ | +0.20     | -0.36                      | +0.49        | $S_{10}=4.52eV (CT_{R0}), A_2$ | +0.79                      | $S_3=3.13eV (CT_{R0}), A_2$    | -0.31                     | in $\rightarrow$ Ag |
|                   |           |                            | +0.39        | $S_{11}=4.52eV (CT_{R1}), B_2$ | +0.77                      | $S_9=3.96eV (CT_{R1}), A_1$    |                           |                     |
|                   |           |                            | +0.25        | $S_{18}=5.39eV (CT_{R2}), A_1$ | +0.78                      | $S_{11}=4.30eV (CT_{R2}), B_2$ |                           |                     |
|                   |           |                            |              |                                | +0.75                      | $S_{15}=4.66eV (CT_{R3}), A_2$ |                           |                     |
| $Ag_3^{+}-in^{-}$ | +0.33     | -0.36                      | +0.54        | $S_6=4.49eV (CT_{R0}), A_2$    | +0.83                      | $S_2=3.10eV (CT_{R0}), A_2$    | -0.28                     | in $\rightarrow$ Ag |
|                   |           |                            | +0.41        | $S_7=4.49eV (CT_{R1}), B_2$    | +0.81                      | $S_4=3.92eV (CT_{R1}), A_1$    |                           |                     |
|                   |           |                            | +0.24        | $S_{11}=5.36eV (CT_{R2}), A_1$ | +0.87                      | $S_8=4.27eV (CT_{R2}), B_2$    |                           |                     |
|                   |           |                            |              |                                | +0.78                      | $S_{10}=4.54eV (CT_{R3}), A_2$ |                           |                     |



**Table S2.-** Time dependent wB97X-D/LanL2DZ results for  $[(Ag_n)^q-Oin^-]^{q-1}$  and  $[(Ag_n)^q-Nin^-]^{q-1}$  complexes: donated charge in the ground  $S_0$  state ( $q_{M\leftarrow A,S_0}$ ) and transferred charge  $\Delta q_t$ , energies and symmetries of the roots ( $S_i$ ) corresponding to the forward ( $Ag \rightarrow in$ ) and reverse ( $in \rightarrow Ag$ )  $CT_{Fi}$  and  $CT_{Ri}$  excited states.

| Complex      | $q_{eff}$ | $[(Ag_n)^q-Oin^-]^{q-1}$ |              |                               | $[(Ag_n)^q-Nin^-]^{q-1}$ |                                |                         | CT direction        |
|--------------|-----------|--------------------------|--------------|-------------------------------|--------------------------|--------------------------------|-------------------------|---------------------|
|              |           | $q_{M\leftarrow A,S_0}$  | $\Delta q_t$ | CT states                     | $\Delta q_t$             | CT states                      | $q_{M\leftarrow A,S_0}$ |                     |
| $Ag_3^-in^-$ | -0.33     | -0.16                    | -0.73        | $S_3=2.17eV (CT_{F0}),B_1$    | -0.68                    | $S_4=2.73eV (CT_{F0}),B_1$     | -0.13                   | $Ag \rightarrow in$ |
|              |           |                          | -0.82        | $S_7=3.02eV (CT_{F1}),A_2$    | -0.80                    | $S_8=3.47eV (CT_{F1}),A_2$     |                         |                     |
| $Ag_5^-in^-$ | -0.20     | -0.22                    | -0.42        | $S_4=2.77eV (CT_{F0}),B_1$    | -0.69                    | $S_8=3.35eV (CT_{F0}),B_1$     | -0.15                   | $Ag \rightarrow in$ |
|              |           |                          | -0.81        | $S_{12}=3.78eV (CT_{F1}),A_2$ | -0.79                    | $S_{17}=4.14eV (CT_{F1}),A_2$  |                         |                     |
| $Ag_7^-in^-$ | -0.14     | -0.23                    | -0.51        | $S_9=3.23eV (CT_{F0}),B_1$    | -0.60                    | $S_{15}=3.78eV (CT_{F0}),B_1$  | -0.18                   | $Ag \rightarrow in$ |
|              |           |                          | -0.79        | $S_{24}=4.30eV (CT_{F1}),A_2$ | -0.80                    | $S_{34}=4.61eV (CT_{F1}),A_2$  |                         |                     |
| $Ag_2^-in^-$ | 0.00      | -0.27                    | -0.62        | $S_4=3.83eV (CT_{F0}),B_1$    | -0.67                    | $S_7=4.52eV (CT_{F0}),B_1$     | -0.22                   | $Ag \rightarrow in$ |
|              |           |                          | -0.73        | $S_{11}=4.99eV (CT_{F1}),A_2$ | -0.73                    | $S_{21}=5.40eV (CT_{F1}),A_2$  |                         |                     |
| $Ag_7^+in^-$ | +0.14     | -0.43                    | +0.47        | $S_3=2.53eV (CT_{R0}),B_2$    | +0.79                    | $S_1=1.08eV (CT_{R0}),B_2$     | -0.34                   | $in \rightarrow Ag$ |
|              |           |                          | +0.59        | $S_6=3.08eV (CT_{R1}),A_2$    | +0.79                    | $S_2=1.19eV (CT_{R1}),A_2$     |                         |                     |
|              |           |                          | +0.31        | $S_8=3.66eV (CT_{R2}),A_1$    | +0.80                    | $S_3=1.22eV (CT_{R2}),A_1$     |                         |                     |
|              |           |                          | +0.52        | $S_{12}=3.98eV (CT_{R3}),A_1$ | +0.80                    | $S_7=2.54eV (CT_{R0'}),B_2$    |                         |                     |
|              |           |                          | +0.74        | $S_{21}=4.19eV (CT_{R4}),A_2$ | +0.80                    | $S_8=2.64eV (CT_{R1'}),A_2$    |                         |                     |
|              |           |                          |              |                               | +0.79                    | $S_9=2.68eV (CT_{R2'}),A_1$    |                         |                     |
|              |           |                          |              |                               | +0.64                    | $S_{14}=3.38eV (CT_{R3}),B_1$  |                         |                     |
|              |           |                          |              |                               | +0.73                    | $S_{15}=3.44eV (CT_{R4}),A_2$  |                         |                     |
|              |           |                          |              |                               | +0.18                    | $S_{17}=3.55eV (CT_{R5}),A_1$  |                         |                     |
| $Ag_5^+in^-$ | +0.20     | -0.44                    | +0.44        | $S_2=2.53eV (CT_{R0}),B_2$    | +0.79                    | $S_1=1.08eV (CT_{R0}),A_2$     | -0.34                   | $in \rightarrow Ag$ |
|              |           |                          | +0.59        | $S_4=3.08eV (CT_{R1}),A_2$    | +0.79                    | $S_2=1.18eV (CT_{R1}),A_1$     |                         |                     |
|              |           |                          | +0.27        | $S_6=3.65eV (CT_{R2}),A_1$    | +0.78                    | $S_3=1.20eV (CT_{R2}),B_2$     |                         |                     |
|              |           |                          | +0.57        | $S_{10}=4.08eV (CT_{R3}),A_1$ | +0.79                    | $S_8=3.03eV (CT_{R2'}),A_1$    |                         |                     |
|              |           |                          | +0.74        | $S_{16}=4.26eV (CT_{R4}),A_2$ | +0.79                    | $S_9=3.13eV (CT_{R3'}),B_2$    |                         |                     |
|              |           |                          |              |                               | +0.79                    | $S_{10}=3.16eV (CT_{R1'}),A_2$ |                         |                     |
|              |           |                          |              |                               | +0.64                    | $S_{12}=3.33eV (CT_{R3}),B_1$  |                         |                     |
|              |           |                          |              |                               | +0.75                    | $S_{13}=3.38eV (CT_{R4}),A_2$  |                         |                     |
|              |           |                          |              |                               | +0.22                    | $S_{15}=3.48eV (CT_{R5}),A_1$  |                         |                     |
| $Ag_3^+in^-$ | +0.33     | -0.44                    | +0.46        | $S_2=2.59eV (CT_{R0}),B_2$    | +0.77                    | $S_1=1.15eV (CT_{R0}),B_2$     | -0.35                   | $in \rightarrow Ag$ |
|              |           |                          | +0.59        | $S_3=3.14eV (CT_{R1}),A_2$    | +0.78                    | $S_2=1.26eV (CT_{R1}),A_2$     |                         |                     |
|              |           |                          | +0.19        | $S_4=3.69eV (CT_{R2}),A_1$    | +0.76                    | $S_3=1.27eV (CT_{R2}),A_1$     |                         |                     |
|              |           |                          | +0.27        | $S_6=4.02eV (CT_{R3}),A_1$    | +0.62                    | $S_7=3.31eV (CT_{R3}),B_1$     |                         |                     |
|              |           |                          | +0.73        | $S_{11}=4.46eV (CT_{R4}),A_2$ | +0.72                    | $S_8=3.34eV (CT_{R4}),A_2$     |                         |                     |
|              |           |                          |              |                               | +0.24                    | $S_{10}=3.38eV (CT_{R5}),A_1$  |                         |                     |
|              |           |                          |              |                               | +0.81                    | $S_{18}=4.24eV (CT_{R0'}),B_2$ |                         |                     |
|              |           |                          |              |                               | +0.82                    | $S_{21}=4.35eV (CT_{R1'}),A_2$ |                         |                     |
|              |           |                          |              |                               | +0.85                    | $S_{22}=4.37eV (CT_{R2'}),A_1$ |                         |                     |

**Table S3.-** M06-HF/LanL2DZ and wB97X-D optimized geometries for the ground  $S_0$  state of the  $[(Ag_n)^q-Oin]^{q-1}$  and  $[(Ag_n)^q-Nin]^{q-1}$  complexes.

**M06-HF/LanL2DZ Optimized geometries of  $[(Ag_n)^q-Nin]^{q-1}$**

**$[(Ag_3)^{+1}-Nin]^{0}$**

|    |          |           |           |
|----|----------|-----------|-----------|
| N  | 0.000000 | 0.000000  | 2.520007  |
| C  | 0.000000 | 1.173492  | 1.835184  |
| C  | 0.000000 | -1.173492 | 1.835184  |
| C  | 0.000000 | 1.209247  | 0.441953  |
| C  | 0.000000 | -1.209247 | 0.441953  |
| C  | 0.000000 | 0.000000  | -0.268153 |
| H  | 0.000000 | 2.084430  | 2.420189  |
| H  | 0.000000 | -2.084430 | 2.420189  |
| H  | 0.000000 | 2.133911  | -0.122388 |
| H  | 0.000000 | -2.133911 | -0.122388 |
| C  | 0.000000 | 0.000000  | -1.816413 |
| O  | 0.000000 | -1.160366 | -2.329641 |
| O  | 0.000000 | 1.160366  | -2.329641 |
| Ag | 0.000000 | 0.000000  | 4.690571  |
| Ag | 0.000000 | 0.000000  | 7.618447  |
| Ag | 0.000000 | 0.000000  | 10.324789 |

**$[(Ag_5)^{+1}-Nin]^{0}$**

|    |          |           |           |
|----|----------|-----------|-----------|
| N  | 0.000000 | 0.000000  | 2.423871  |
| C  | 0.000000 | 1.172885  | 1.738981  |
| C  | 0.000000 | -1.172885 | 1.738981  |
| C  | 0.000000 | 1.208974  | 0.345455  |
| C  | 0.000000 | -1.208974 | 0.345455  |
| C  | 0.000000 | 0.000000  | -0.364958 |
| H  | 0.000000 | 2.083420  | 2.324586  |
| H  | 0.000000 | -2.083420 | 2.324586  |
| H  | 0.000000 | 2.133879  | -0.218249 |
| H  | 0.000000 | -2.133879 | -0.218249 |
| C  | 0.000000 | 0.000000  | -1.913043 |
| O  | 0.000000 | -1.159957 | -2.427712 |
| O  | 0.000000 | 1.159957  | -2.427712 |
| Ag | 0.000000 | 0.000000  | 4.600113  |
| Ag | 0.000000 | 0.000000  | 7.494233  |
| Ag | 0.000000 | 0.000000  | 10.227856 |
| Ag | 0.000000 | 0.000000  | 13.183876 |
| Ag | 0.000000 | 0.000000  | 15.881774 |

**$[(Ag_7)^{+1}-Nin]^{0}$**

|    |          |           |           |
|----|----------|-----------|-----------|
| N  | 0.000000 | 0.000000  | 2.281950  |
| C  | 0.000000 | 1.172582  | 1.597054  |
| C  | 0.000000 | -1.172582 | 1.597054  |
| C  | 0.000000 | 1.208825  | 0.203342  |
| C  | 0.000000 | -1.208825 | 0.203342  |
| C  | 0.000000 | 0.000000  | -0.507220 |
| H  | 0.000000 | 2.082947  | 2.182939  |
| H  | 0.000000 | -2.082947 | 2.182939  |
| H  | 0.000000 | 2.133890  | -0.360035 |
| H  | 0.000000 | -2.133890 | -0.360035 |
| C  | 0.000000 | 0.000000  | -2.055136 |
| O  | 0.000000 | -1.159786 | -2.570610 |
| O  | 0.000000 | 1.159786  | -2.570610 |
| Ag | 0.000000 | 0.000000  | 4.461063  |
| Ag | 0.000000 | 0.000000  | 7.340758  |
| Ag | 0.000000 | 0.000000  | 10.086459 |
| Ag | 0.000000 | 0.000000  | 13.012540 |
| Ag | 0.000000 | 0.000000  | 15.733875 |
| Ag | 0.000000 | 0.000000  | 18.703215 |
| Ag | 0.000000 | 0.000000  | 21.396958 |

**$[(Ag_2)^{0}-Nin]^{-1}$**

|    |          |           |           |
|----|----------|-----------|-----------|
| N  | 0.000000 | 0.000000  | 2.548120  |
| C  | 0.000000 | 1.166894  | 1.863172  |
| C  | 0.000000 | -1.166894 | 1.863172  |
| C  | 0.000000 | 1.206151  | 0.465837  |
| C  | 0.000000 | -1.206151 | 0.465837  |
| C  | 0.000000 | 0.000000  | -0.248417 |
| H  | 0.000000 | 2.073499  | 2.455204  |
| H  | 0.000000 | -2.073499 | 2.455204  |
| H  | 0.000000 | 2.134429  | -0.091041 |
| H  | 0.000000 | -2.134429 | -0.091041 |
| C  | 0.000000 | 0.000000  | -1.793695 |
| O  | 0.000000 | -1.156299 | -2.324603 |
| O  | 0.000000 | 1.156299  | -2.324603 |
| Ag | 0.000000 | 0.000000  | 4.808870  |
| Ag | 0.000000 | 0.000000  | 7.507829  |

**$[(Ag_7)^{-1}-Nin]^{-2}$**

|    |          |           |           |
|----|----------|-----------|-----------|
| N  | 0.000000 | 0.000000  | 2.205419  |
| C  | 0.000000 | 1.166188  | 1.521244  |
| C  | 0.000000 | -1.166188 | 1.521244  |
| C  | 0.000000 | 1.205785  | 0.122925  |
| C  | 0.000000 | -1.205785 | 0.122925  |
| C  | 0.000000 | 0.000000  | -0.592178 |
| H  | 0.000000 | 2.071754  | 2.114949  |
| H  | 0.000000 | -2.071754 | 2.114949  |
| H  | 0.000000 | 2.135069  | -0.432122 |
| H  | 0.000000 | -2.135069 | -0.432122 |
| C  | 0.000000 | 0.000000  | -2.136951 |
| O  | 0.000000 | -1.155351 | -2.672235 |
| O  | 0.000000 | 1.155351  | -2.672235 |
| Ag | 0.000000 | 0.000000  | 4.515410  |
| Ag | 0.000000 | 0.000000  | 7.228914  |
| Ag | 0.000000 | 0.000000  | 10.347570 |
| Ag | 0.000000 | 0.000000  | 13.102692 |
| Ag | 0.000000 | 0.000000  | 16.023349 |
| Ag | 0.000000 | 0.000000  | 18.889046 |
| Ag | 0.000000 | 0.000000  | 21.667049 |

**$[(Ag_5)^{-1}-Nin]^{-2}$**

|    |          |           |           |
|----|----------|-----------|-----------|
| N  | 0.000000 | 0.000000  | 2.355847  |
| C  | 0.000000 | 1.165089  | 1.671837  |
| C  | 0.000000 | -1.165089 | 1.671837  |
| C  | 0.000000 | 1.205364  | 0.272657  |
| C  | 0.000000 | -1.205364 | 0.272657  |
| C  | 0.000000 | 0.000000  | -0.443326 |
| H  | 0.000000 | 2.069739  | 2.267109  |
| H  | 0.000000 | -2.069739 | 2.267109  |
| H  | 0.000000 | 2.135368  | -0.281077 |
| H  | 0.000000 | -2.135368 | -0.281077 |
| C  | 0.000000 | 0.000000  | -1.987704 |
| O  | 0.000000 | -1.154606 | -2.526298 |
| O  | 0.000000 | 1.154606  | -2.526298 |
| Ag | 0.000000 | 0.000000  | 4.705378  |
| Ag | 0.000000 | 0.000000  | 7.430377  |
| Ag | 0.000000 | 0.000000  | 10.561119 |
| Ag | 0.000000 | 0.000000  | 13.397759 |
| Ag | 0.000000 | 0.000000  | 16.231939 |

**[(Ag<sub>3</sub>)<sup>-1</sup>-Nin]<sup>-2</sup>**

|    |          |           |           |
|----|----------|-----------|-----------|
| N  | 0.000000 | 0.000000  | 2.475638  |
| C  | 0.000000 | 1.163170  | 1.791672  |
| C  | 0.000000 | -1.163170 | 1.791672  |
| C  | 0.000000 | 1.204725  | 0.390956  |
| C  | 0.000000 | -1.204725 | 0.390956  |
| C  | 0.000000 | 0.000000  | -0.326577 |
| H  | 0.000000 | 2.066124  | 2.389946  |
| H  | 0.000000 | -2.066124 | 2.389946  |
| H  | 0.000000 | 2.135854  | -0.160836 |
| H  | 0.000000 | -2.135854 | -0.160836 |
| C  | 0.000000 | 0.000000  | -1.870175 |
| O  | 0.000000 | -1.153406 | -2.414409 |
| O  | 0.000000 | 1.153406  | -2.414409 |
| Ag | 0.000000 | 0.000000  | 4.908336  |
| Ag | 0.000000 | 0.000000  | 7.706615  |
| Ag | 0.000000 | 0.000000  | 10.671349 |

**M06-HF/LanL2DZ Optimized geometries of  $[(Ag_n)^q-Oin]^q$  systems**

**$[(Ag_3)^{+1}-Oin]^0$**

|    |          |           |            |
|----|----------|-----------|------------|
| N  | 0.000000 | 0.000000  | 2.558225   |
| C  | 0.000000 | 1.161068  | 1.872675   |
| C  | 0.000000 | -1.161068 | 1.872675   |
| C  | 0.000000 | 1.209517  | 0.471345   |
| C  | 0.000000 | -1.209517 | 0.471345   |
| C  | 0.000000 | 0.000000  | -0.233007  |
| H  | 0.000000 | 2.065766  | 2.465785   |
| H  | 0.000000 | -2.065766 | 2.465785   |
| H  | 0.000000 | 2.147419  | -0.068373  |
| H  | 0.000000 | -2.147419 | -0.068373  |
| C  | 0.000000 | 0.000000  | -1.735037  |
| O  | 0.000000 | -1.120041 | -2.370529  |
| O  | 0.000000 | 1.120041  | -2.370529  |
| Ag | 0.000000 | 0.000000  | -4.419501  |
| Ag | 0.000000 | 0.000000  | -7.432969  |
| Ag | 0.000000 | 0.000000  | -10.119674 |

**$[(Ag_5)^{+1}-Oin]^0$**

|    |          |           |            |
|----|----------|-----------|------------|
| N  | 0.000000 | 0.000000  | 2.668759   |
| C  | 0.000000 | 1.161016  | 1.983060   |
| C  | 0.000000 | -1.161016 | 1.983060   |
| C  | 0.000000 | 1.209419  | 0.581742   |
| C  | 0.000000 | -1.209419 | 0.581742   |
| C  | 0.000000 | 0.000000  | -0.122776  |
| H  | 0.000000 | 2.065759  | 2.576114   |
| H  | 0.000000 | -2.065759 | 2.576114   |
| H  | 0.000000 | 2.147173  | 0.041768   |
| H  | 0.000000 | -2.147173 | 0.041768   |
| C  | 0.000000 | 0.000000  | -1.625199  |
| O  | 0.000000 | -1.120198 | -2.259850  |
| O  | 0.000000 | 1.120198  | -2.259850  |
| Ag | 0.000000 | 0.000000  | -4.312454  |
| Ag | 0.000000 | 0.000000  | -7.302997  |
| Ag | 0.000000 | 0.000000  | -10.002929 |
| Ag | 0.000000 | 0.000000  | -13.000319 |
| Ag | 0.000000 | 0.000000  | -15.687912 |

**$[(Ag_7)^{+1}-Oin]^0$**

|    |          |           |            |
|----|----------|-----------|------------|
| N  | 0.000000 | 0.000000  | 2.818243   |
| C  | 0.000000 | 1.160986  | 2.132454   |
| C  | 0.000000 | -1.160986 | 2.132454   |
| C  | 0.000000 | 1.209372  | 0.731125   |
| C  | 0.000000 | -1.209372 | 0.731125   |
| C  | 0.000000 | 0.000000  | 0.026524   |
| H  | 0.000000 | 2.065763  | 2.725482   |
| H  | 0.000000 | -2.065763 | 2.725482   |
| H  | 0.000000 | 2.147048  | 0.190997   |
| H  | 0.000000 | -2.147048 | 0.190997   |
| C  | 0.000000 | 0.000000  | -1.476150  |
| O  | 0.000000 | -1.120288 | -2.110300  |
| O  | 0.000000 | 1.120288  | -2.110300  |
| Ag | 0.000000 | 0.000000  | -4.164825  |
| Ag | 0.000000 | 0.000000  | -7.143431  |
| Ag | 0.000000 | 0.000000  | -9.847649  |
| Ag | 0.000000 | 0.000000  | -12.822126 |
| Ag | 0.000000 | 0.000000  | -15.524721 |
| Ag | 0.000000 | 0.000000  | -18.529240 |
| Ag | 0.000000 | 0.000000  | -21.216299 |

**$[(Ag_2)^0-Oin]^{-1}$**

|    |          |           |           |
|----|----------|-----------|-----------|
| N  | 0.000000 | 0.000000  | 2.542723  |
| C  | 0.000000 | 1.159398  | 1.851825  |
| C  | 0.000000 | -1.159398 | 1.851825  |
| C  | 0.000000 | 1.206395  | 0.450465  |
| C  | 0.000000 | -1.206395 | 0.450465  |
| C  | 0.000000 | 0.000000  | -0.260239 |
| H  | 0.000000 | 2.065853  | 2.443471  |
| H  | 0.000000 | -2.065853 | 2.443471  |
| H  | 0.000000 | 2.140067  | -0.097125 |
| H  | 0.000000 | -2.140067 | -0.097125 |
| C  | 0.000000 | 0.000000  | -1.778548 |
| O  | 0.000000 | -1.132103 | -2.374629 |
| C  | 0.000000 | 1.132103  | -2.374629 |
| Ag | 0.000000 | 0.000000  | -4.616850 |
| Ag | 0.000000 | 0.000000  | -7.375255 |

**$[(Ag_7)^{-1}-Oin]^{-2}$**

|    |          |           |            |
|----|----------|-----------|------------|
| N  | 0.000000 | 0.000000  | 2.918245   |
| C  | 0.000000 | 1.159327  | 2.226812   |
| C  | 0.000000 | -1.159327 | 2.226812   |
| C  | 0.000000 | 1.206319  | 0.825491   |
| C  | 0.000000 | -1.206319 | 0.825491   |
| C  | 0.000000 | 0.000000  | 0.114528   |
| H  | 0.000000 | 2.066041  | 2.818157   |
| H  | 0.000000 | -2.066041 | 2.818157   |
| H  | 0.000000 | 2.139621  | 0.277128   |
| H  | 0.000000 | -2.139621 | 0.277128   |
| C  | 0.000000 | 0.000000  | -1.404571  |
| O  | 0.000000 | -1.132280 | -1.999637  |
| O  | 0.000000 | 1.132280  | -1.999637  |
| Ag | 0.000000 | 0.000000  | -4.254639  |
| Ag | 0.000000 | 0.000000  | -7.033690  |
| Ag | 0.000000 | 0.000000  | -10.131716 |
| Ag | 0.000000 | 0.000000  | -12.884220 |
| Ag | 0.000000 | 0.000000  | -15.883563 |
| Ag | 0.000000 | 0.000000  | -18.733451 |
| Ag | 0.000000 | 0.000000  | -21.542983 |

**$[(Ag_5)^{-1}-Oin]^{-2}$**

|    |          |           |            |
|----|----------|-----------|------------|
| N  | 0.000000 | 0.000000  | 2.783689   |
| C  | 0.000000 | 1.159020  | 2.091164   |
| C  | 0.000000 | -1.159020 | 2.091164   |
| C  | 0.000000 | 1.205768  | 0.689815   |
| C  | 0.000000 | -1.205768 | 0.689815   |
| C  | 0.000000 | 0.000000  | -0.022565  |
| H  | 0.000000 | 2.066098  | 2.682268   |
| H  | 0.000000 | -2.066098 | 2.682268   |
| H  | 0.000000 | 2.138302  | 0.139979   |
| H  | 0.000000 | -2.138302 | 0.139979   |
| C  | 0.000000 | 0.000000  | -1.545401  |
| O  | 0.000000 | -1.134733 | -2.132695  |
| O  | 0.000000 | 1.134733  | -2.132695  |
| Ag | 0.000000 | 0.000000  | -4.425911  |
| Ag | 0.000000 | 0.000000  | -7.202986  |
| Ag | 0.000000 | 0.000000  | -10.513868 |
| Ag | 0.000000 | 0.000000  | -13.340781 |
| Ag | 0.000000 | 0.000000  | -16.213395 |

**[(Ag<sub>3</sub>)<sup>-1</sup>-Oin]<sup>-2</sup>**

|    |          |           |            |
|----|----------|-----------|------------|
| N  | 0.000000 | 0.000000  | 2.650603   |
| C  | 0.000000 | 1.158426  | 1.955867   |
| C  | 0.000000 | -1.158426 | 1.955867   |
| C  | 0.000000 | 1.204596  | 0.554450   |
| C  | 0.000000 | -1.204596 | 0.554450   |
| C  | 0.000000 | 0.000000  | -0.161283  |
| H  | 0.000000 | 2.066245  | 2.546543   |
| H  | 0.000000 | -2.066245 | 2.546543   |
| H  | 0.000000 | 2.135699  | 0.001914   |
| H  | 0.000000 | -2.135699 | 0.001914   |
| C  | 0.000000 | 0.000000  | -1.694277  |
| O  | 0.000000 | -1.143009 | -2.259507  |
| O  | 0.000000 | 1.143009  | -2.259507  |
| Ag | 0.000000 | 0.000000  | -4.752612  |
| Ag | 0.000000 | 0.000000  | -7.579715  |
| Ag | 0.000000 | 0.000000  | -10.701407 |

---

wB97XD/LanL2DZ Optimized geometries of  $[(\text{Ag}_n)^q\text{-Nin}]^{q-1}$  systems $[(\text{Ag}_3)^{+1}\text{-Nin}]^0$ 

|    |          |           |           |
|----|----------|-----------|-----------|
| N  | 0.000000 | 0.000000  | 2.556081  |
| C  | 0.000000 | 1.176237  | 1.862197  |
| C  | 0.000000 | -1.176237 | 1.862197  |
| C  | 0.000000 | 1.207335  | 0.471425  |
| C  | 0.000000 | -1.207335 | 0.471425  |
| C  | 0.000000 | 0.000000  | -0.248847 |
| H  | 0.000000 | 2.089289  | 2.446289  |
| H  | 0.000000 | -2.089289 | 2.446289  |
| H  | 0.000000 | 2.134575  | -0.090264 |
| H  | 0.000000 | -2.134575 | -0.090264 |
| C  | 0.000000 | 0.000000  | -1.799363 |
| O  | 0.000000 | -1.163742 | -2.320640 |
| O  | 0.000000 | 1.163742  | -2.320640 |
| Ag | 0.000000 | 0.000000  | 4.701045  |
| Ag | 0.000000 | 0.000000  | 7.490467  |
| Ag | 0.000000 | 0.000000  | 10.122445 |

 $[(\text{Ag}_5)^{+1}\text{-Nin}]^0$ 

|    |          |           |           |
|----|----------|-----------|-----------|
| N  | 0.000000 | 0.000000  | 2.502076  |
| C  | 0.000000 | 1.175392  | 1.807704  |
| C  | 0.000000 | -1.175392 | 1.807704  |
| C  | 0.000000 | 1.206995  | 0.416609  |
| C  | 0.000000 | -1.206995 | 0.416609  |
| C  | 0.000000 | 0.000000  | -0.303932 |
| H  | 0.000000 | 2.088213  | 2.392183  |
| H  | 0.000000 | -2.088213 | 2.392183  |
| H  | 0.000000 | 2.134510  | -0.144520 |
| H  | 0.000000 | -2.134510 | -0.144520 |
| C  | 0.000000 | 0.000000  | -1.854219 |
| O  | 0.000000 | -1.163428 | -2.376743 |
| O  | 0.000000 | 1.163428  | -2.376743 |
| Ag | 0.000000 | 0.000000  | 4.652400  |
| Ag | 0.000000 | 0.000000  | 7.419536  |
| Ag | 0.000000 | 0.000000  | 10.072178 |
| Ag | 0.000000 | 0.000000  | 12.877128 |
| Ag | 0.000000 | 0.000000  | 15.504210 |

 $[(\text{Ag}_7)^{+1}\text{-Nin}]^0$ 

|    |          |           |           |
|----|----------|-----------|-----------|
| N  | 0.000000 | 0.000000  | 2.415918  |
| C  | 0.000000 | 1.174974  | 1.721332  |
| C  | 0.000000 | -1.174974 | 1.721332  |
| C  | 0.000000 | 1.206825  | 0.330042  |
| C  | 0.000000 | -1.206825 | 0.330042  |
| C  | 0.000000 | 0.000000  | -0.390648 |
| H  | 0.000000 | 2.087690  | 2.305995  |
| H  | 0.000000 | -2.087690 | 2.305995  |
| H  | 0.000000 | 2.134496  | -0.230785 |
| H  | 0.000000 | -2.134496 | -0.230785 |
| C  | 0.000000 | 0.000000  | -1.940839 |
| O  | 0.000000 | -1.163256 | -2.464075 |
| O  | 0.000000 | 1.163256  | -2.464075 |
| Ag | 0.000000 | 0.000000  | 4.569267  |
| Ag | 0.000000 | 0.000000  | 7.325907  |
| Ag | 0.000000 | 0.000000  | 9.985325  |
| Ag | 0.000000 | 0.000000  | 12.769761 |
| Ag | 0.000000 | 0.000000  | 15.417791 |
| Ag | 0.000000 | 0.000000  | 18.229260 |
| Ag | 0.000000 | 0.000000  | 20.853084 |

 $[(\text{Ag}_2)^0\text{-Nin}]^{-1}$ 

|    |          |           |           |
|----|----------|-----------|-----------|
| N  | 0.000000 | 0.000000  | 2.569717  |
| C  | 0.000000 | 1.167180  | 1.871764  |
| C  | 0.000000 | -1.167180 | 1.871764  |
| C  | 0.000000 | 1.203843  | 0.476281  |
| C  | 0.000000 | -1.203843 | 0.476281  |
| C  | 0.000000 | 0.000000  | -0.247790 |
| H  | 0.000000 | 2.077216  | 2.461294  |
| H  | 0.000000 | -2.077216 | 2.461294  |
| H  | 0.000000 | 2.134827  | -0.078535 |
| H  | 0.000000 | -2.134827 | -0.078535 |
| C  | 0.000000 | 0.000000  | -1.795805 |
| O  | 0.000000 | -1.159843 | -2.333720 |
| O  | 0.000000 | 1.159843  | -2.333720 |
| Ag | 0.000000 | 0.000000  | 4.806383  |
| Ag | 0.000000 | 0.000000  | 7.433168  |

 $[(\text{Ag}_7)^{-1}\text{-Nin}]^{-2}$ 

|    |          |           |           |
|----|----------|-----------|-----------|
| N  | 0.000000 | 0.000000  | 2.365190  |
| C  | 0.000000 | 1.166043  | 1.667181  |
| C  | 0.000000 | -1.166043 | 1.667181  |
| C  | 0.000000 | 1.203397  | 0.270689  |
| C  | 0.000000 | -1.203397 | 0.270689  |
| C  | 0.000000 | 0.000000  | -0.454268 |
| H  | 0.000000 | 2.075583  | 2.257795  |
| H  | 0.000000 | -2.075583 | 2.257795  |
| H  | 0.000000 | 2.135703  | -0.282002 |
| H  | 0.000000 | -2.135703 | -0.282002 |
| C  | 0.000000 | 0.000000  | -2.001941 |
| O  | 0.000000 | -1.159063 | -2.543742 |
| O  | 0.000000 | 1.159063  | -2.543742 |
| Ag | 0.000000 | 0.000000  | 4.636469  |
| Ag | 0.000000 | 0.000000  | 7.284345  |
| Ag | 0.000000 | 0.000000  | 10.154355 |
| Ag | 0.000000 | 0.000000  | 12.823538 |
| Ag | 0.000000 | 0.000000  | 15.612318 |
| Ag | 0.000000 | 0.000000  | 18.358544 |
| Ag | 0.000000 | 0.000000  | 21.041449 |

 $[(\text{Ag}_5)^{-1}\text{-Nin}]^{-2}$ 

|    |          |           |           |
|----|----------|-----------|-----------|
| N  | 0.000000 | 0.000000  | 2.451288  |
| C  | 0.000000 | 1.164433  | 1.753048  |
| C  | 0.000000 | -1.164433 | 1.753048  |
| C  | 0.000000 | 1.202970  | 0.355423  |
| C  | 0.000000 | -1.202970 | 0.355423  |
| C  | 0.000000 | 0.000000  | -0.370387 |
| H  | 0.000000 | 2.073185  | 2.345330  |
| H  | 0.000000 | -2.073185 | 2.345330  |
| H  | 0.000000 | 2.136178  | -0.195822 |
| H  | 0.000000 | -2.136178 | -0.195822 |
| C  | 0.000000 | 0.000000  | -1.917774 |
| O  | 0.000000 | -1.158344 | -2.462811 |
| O  | 0.000000 | 1.158344  | -2.462811 |
| Ag | 0.000000 | 0.000000  | 4.771899  |
| Ag | 0.000000 | 0.000000  | 7.424492  |
| Ag | 0.000000 | 0.000000  | 10.312426 |
| Ag | 0.000000 | 0.000000  | 13.034650 |
| Ag | 0.000000 | 0.000000  | 15.762914 |

**[(Ag<sub>3</sub>)<sup>-1</sup>-Nin]<sup>-2</sup>**

|    |          |           |           |
|----|----------|-----------|-----------|
| N  | 0.000000 | 0.000000  | 2.512697  |
| C  | 0.000000 | 1.161644  | 1.813761  |
| C  | 0.000000 | -1.161644 | 1.813761  |
| C  | 0.000000 | 1.202383  | 0.414217  |
| C  | 0.000000 | -1.202383 | 0.414217  |
| C  | 0.000000 | 0.000000  | -0.313048 |
| H  | 0.000000 | 2.069139  | 2.409069  |
| H  | 0.000000 | -2.069139 | 2.409069  |
| H  | 0.000000 | 2.136950  | -0.135016 |
| H  | 0.000000 | -2.136950 | -0.135016 |
| C  | 0.000000 | 0.000000  | -1.859857 |
| O  | 0.000000 | -1.157218 | -2.410163 |
| O  | 0.000000 | 1.157218  | -2.410163 |
| Ag | 0.000000 | 0.000000  | 4.943546  |
| Ag | 0.000000 | 0.000000  | 7.629461  |
| Ag | 0.000000 | 0.000000  | 10.463306 |

---

$[(\text{Ag}_3)^{+1}\text{-Oin}]^0$ 

|    |          |           |           |
|----|----------|-----------|-----------|
| N  | 0.000000 | 0.000000  | 2.548556  |
| C  | 0.000000 | 1.158198  | 1.848755  |
| C  | 0.000000 | -1.158198 | 1.848755  |
| C  | 0.000000 | 1.207871  | 0.447754  |
| C  | 0.000000 | -1.207871 | 0.447754  |
| C  | 0.000000 | 0.000000  | -0.266040 |
| H  | 0.000000 | 2.068577  | 2.438073  |
| H  | 0.000000 | -2.068577 | 2.438073  |
| H  | 0.000000 | 2.150401  | -0.085557 |
| H  | 0.000000 | -2.150401 | -0.085557 |
| C  | 0.000000 | 0.000000  | -1.764914 |
| O  | 0.000000 | -1.130888 | -2.394871 |
| O  | 0.000000 | 1.130888  | -2.394871 |
| Ag | 0.000000 | 0.000000  | -4.458529 |
| Ag | 0.000000 | 0.000000  | -7.296833 |
| Ag | 0.000000 | 0.000000  | -9.910703 |

 $[(\text{Ag}_5)^{+1}\text{-Oin}]^0$ 

|    |          |           |            |
|----|----------|-----------|------------|
| N  | 0.000000 | 0.000000  | 2.616802   |
| C  | 0.000000 | 1.158144  | 1.916836   |
| C  | 0.000000 | -1.158144 | 1.916836   |
| C  | 0.000000 | 1.207763  | 0.515833   |
| C  | 0.000000 | -1.207763 | 0.515833   |
| C  | 0.000000 | 0.000000  | -0.198135  |
| H  | 0.000000 | 2.068596  | 2.506100   |
| H  | 0.000000 | -2.068596 | 2.506100   |
| H  | 0.000000 | 2.150164  | -0.017741  |
| H  | 0.000000 | -2.150164 | -0.017741  |
| C  | 0.000000 | 0.000000  | -1.697473  |
| O  | 0.000000 | -1.130950 | -2.326705  |
| O  | 0.000000 | 1.130950  | -2.326705  |
| Ag | 0.000000 | 0.000000  | -4.394472  |
| Ag | 0.000000 | 0.000000  | -7.222084  |
| Ag | 0.000000 | 0.000000  | -9.854335  |
| Ag | 0.000000 | 0.000000  | -12.680776 |
| Ag | 0.000000 | 0.000000  | -15.298328 |

 $[(\text{Ag}_7)^{+1}\text{-Oin}]^0$ 

|    |          |           |            |
|----|----------|-----------|------------|
| N  | 0.000000 | 0.000000  | 2.710677   |
| C  | 0.000000 | 1.158120  | 2.010622   |
| C  | 0.000000 | -1.158120 | 2.010622   |
| C  | 0.000000 | 1.207709  | 0.609622   |
| C  | 0.000000 | -1.207709 | 0.609622   |
| C  | 0.000000 | 0.000000  | -0.104438  |
| H  | 0.000000 | 2.068605  | 2.599860   |
| H  | 0.000000 | -2.068605 | 2.599860   |
| H  | 0.000000 | 2.150049  | 0.075929   |
| H  | 0.000000 | -2.150049 | 0.075929   |
| C  | 0.000000 | 0.000000  | -1.603983  |
| O  | 0.000000 | -1.130978 | -2.232893  |
| O  | 0.000000 | 1.130978  | -2.232893  |
| Ag | 0.000000 | 0.000000  | -4.302556  |
| Ag | 0.000000 | 0.000000  | -7.125672  |
| Ag | 0.000000 | 0.000000  | -9.761670  |
| Ag | 0.000000 | 0.000000  | -12.575136 |
| Ag | 0.000000 | 0.000000  | -15.211489 |
| Ag | 0.000000 | 0.000000  | -18.037080 |
| Ag | 0.000000 | 0.000000  | -20.655087 |

 $[(\text{Ag}_2)^0\text{-Oin}]^{-1}$ 

|    |          |           |           |
|----|----------|-----------|-----------|
| N  | 0.000000 | 0.000000  | 2.551713  |
| C  | 0.000000 | 1.156647  | 1.846180  |
| C  | 0.000000 | -1.156647 | 1.846180  |
| C  | 0.000000 | 1.204487  | 0.445239  |
| C  | 0.000000 | -1.204487 | 0.445239  |
| C  | 0.000000 | 0.000000  | -0.275160 |
| H  | 0.000000 | 2.069248  | 2.434161  |
| H  | 0.000000 | -2.069248 | 2.434161  |
| H  | 0.000000 | 2.142820  | -0.096484 |
| H  | 0.000000 | -2.142820 | -0.096484 |
| C  | 0.000000 | 0.000000  | -1.791001 |
| O  | 0.000000 | -1.136976 | -2.392661 |
| O  | 0.000000 | 1.136976  | -2.392661 |
| Ag | 0.000000 | 0.000000  | -4.615775 |
| Ag | 0.000000 | 0.000000  | -7.282805 |

 $[(\text{Ag}_7)^{-1}\text{-Oin}]^{-2}$ 

|    |          |           |            |
|----|----------|-----------|------------|
| N  | 0.000000 | 0.000000  | 2.783620   |
| C  | 0.000000 | 1.156548  | 2.077446   |
| C  | 0.000000 | -1.156548 | 2.077446   |
| C  | 0.000000 | 1.204340  | 0.676551   |
| C  | 0.000000 | -1.204340 | 0.676551   |
| C  | 0.000000 | 0.000000  | -0.044223  |
| H  | 0.000000 | 2.069453  | 2.665147   |
| H  | 0.000000 | -2.069453 | 2.665147   |
| H  | 0.000000 | 2.142250  | 0.133975   |
| H  | 0.000000 | -2.142250 | 0.133975   |
| C  | 0.000000 | 0.000000  | -1.561187  |
| O  | 0.000000 | -1.137563 | -2.160768  |
| O  | 0.000000 | 1.137563  | -2.160768  |
| Ag | 0.000000 | 0.000000  | -4.394869  |
| Ag | 0.000000 | 0.000000  | -7.079665  |
| Ag | 0.000000 | 0.000000  | -9.940128  |
| Ag | 0.000000 | 0.000000  | -12.609490 |
| Ag | 0.000000 | 0.000000  | -15.434377 |
| Ag | 0.000000 | 0.000000  | -18.169160 |
| Ag | 0.000000 | 0.000000  | -20.875380 |

 $[(\text{Ag}_5)^{-1}\text{-Oin}]^{-2}$ 

|    |          |           |            |
|----|----------|-----------|------------|
| N  | 0.000000 | 0.000000  | 2.711355   |
| C  | 0.000000 | 1.156281  | 2.003883   |
| C  | 0.000000 | -1.156281 | 2.003883   |
| C  | 0.000000 | 1.203663  | 0.602974   |
| C  | 0.000000 | -1.203663 | 0.602974   |
| C  | 0.000000 | 0.000000  | -0.119508  |
| H  | 0.000000 | 2.069688  | 2.591401   |
| H  | 0.000000 | -2.069688 | 2.591401   |
| H  | 0.000000 | 2.140386  | 0.057963   |
| H  | 0.000000 | -2.140386 | 0.057963   |
| C  | 0.000000 | 0.000000  | -1.642341  |
| O  | 0.000000 | -1.141501 | -2.230670  |
| O  | 0.000000 | 1.141501  | -2.230670  |
| Ag | 0.000000 | 0.000000  | -4.550530  |
| Ag | 0.000000 | 0.000000  | -7.231417  |
| Ag | 0.000000 | 0.000000  | -10.190112 |
| Ag | 0.000000 | 0.000000  | -12.903633 |
| Ag | 0.000000 | 0.000000  | -15.665073 |



**[(Ag<sub>3</sub>)<sup>-1</sup>-Oin]<sup>-2</sup>**

|    |          |           |            |
|----|----------|-----------|------------|
| N  | 0.000000 | 0.000000  | 2.641578   |
| C  | 0.000000 | 1.155999  | 1.932182   |
| C  | 0.000000 | -1.155999 | 1.932182   |
| C  | 0.000000 | 1.202686  | 0.531254   |
| C  | 0.000000 | -1.202686 | 0.531254   |
| C  | 0.000000 | 0.000000  | -0.194034  |
| H  | 0.000000 | 2.070169  | 2.519524   |
| H  | 0.000000 | -2.070169 | 2.519524   |
| H  | 0.000000 | 2.137505  | -0.017739  |
| H  | 0.000000 | -2.137505 | -0.017739  |
| C  | 0.000000 | 0.000000  | -1.727658  |
| O  | 0.000000 | -1.148275 | -2.296929  |
| O  | 0.000000 | 1.148275  | -2.296929  |
| Ag | 0.000000 | 0.000000  | -4.789893  |
| Ag | 0.000000 | 0.000000  | -7.493424  |
| Ag | 0.000000 | 0.000000  | -10.413307 |

---
